# Supplementary material for: A highly efficient gold/electrospun PAN fiber material for improved laccase biocathodes for biofuel cell applications
Source: Royal Society of Chemistry journal article supplement (doi:10.1039/c3ta14531j), 2013-12-09
Supplement: c3ta14531j.pdf [file c3ta14531j.pdf]

# Supporting information

## A highly efficient gold/electrospun PAN fibers material for improved laccase biocathodes for biofuel cell applications

*Djamel SELLOUM<sup>a,b,‡</sup>, adib ABOU CHAAYA<sup>a,‡</sup>, Mikhael BECHELANY<sup>a</sup>, Vincent ROUESSAC<sup>a</sup>, Philippe MIELE<sup>a</sup>, Sophie TINGRY<sup>a</sup>*

<sup>a</sup>Institut Européen des Membranes, UMR 5635, ENSCM-UMII-CNRS, place Eugène Bataillon, 34095 Montpellier, France

<sup>b</sup>Laboratoire de Croissance et de Caractérisation de Nouveaux Semiconducteurs (LCCNS), Faculté de Technologie, Université Setif 1, Setif 19000, Algérie

### SI1. Design of the Si/PAN/Au electrodes

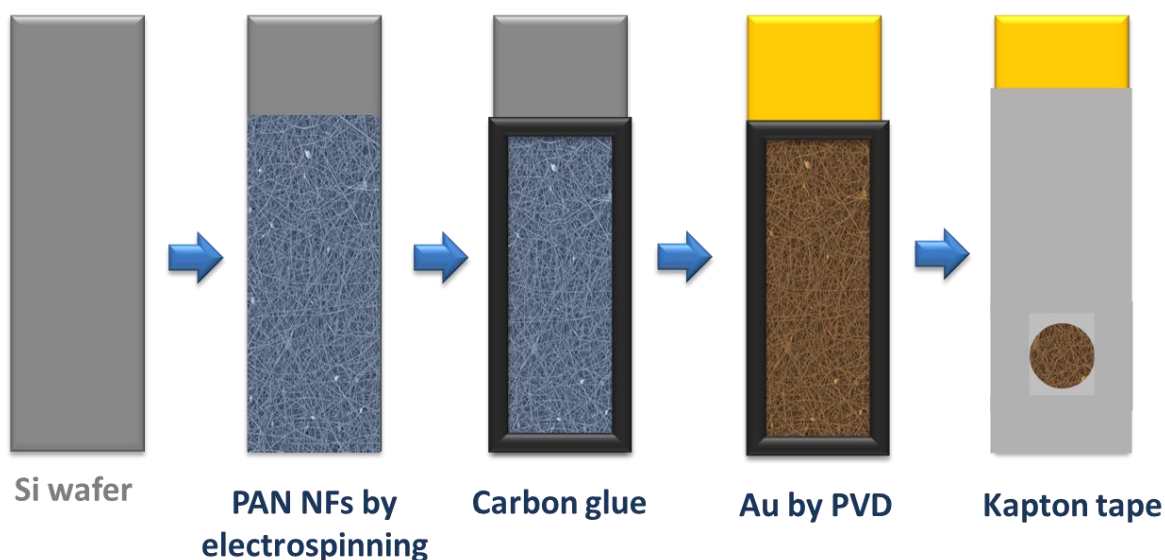

**Figure SI1a.** Schema of the design of PAN/Au NFs electrodes

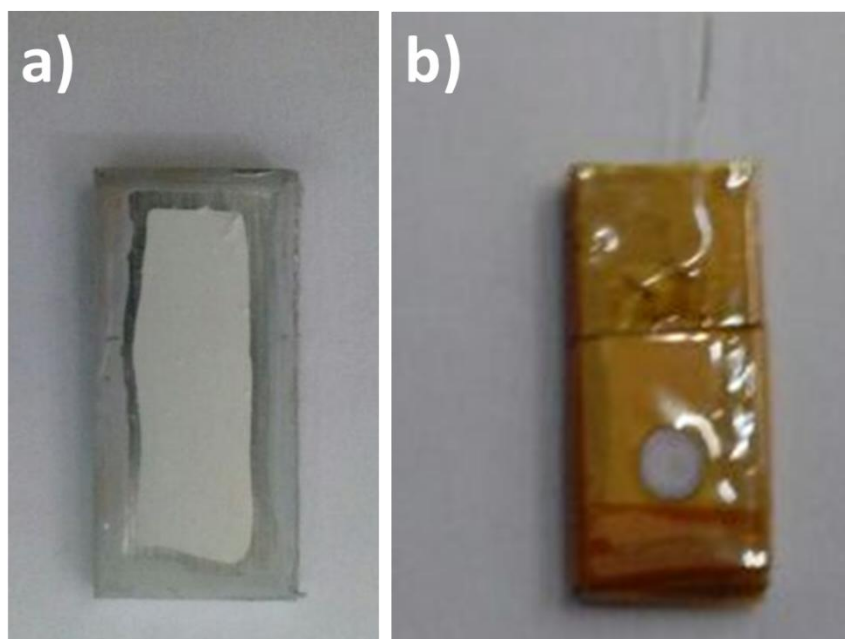

**Figure SI1b.** Digital micrograph of the PAN/Au electrodes.

**SI2. Cross section view of Si/PAN/Au electrodes**

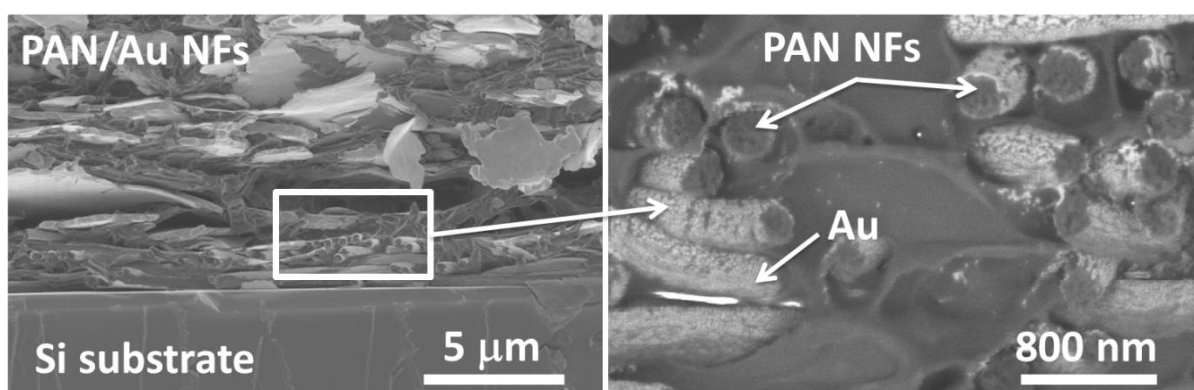

**Figure SI2.** Cross section SEM images of PAN/Au NFs electrodes

### SI3. Cracks observed on thick Au layers

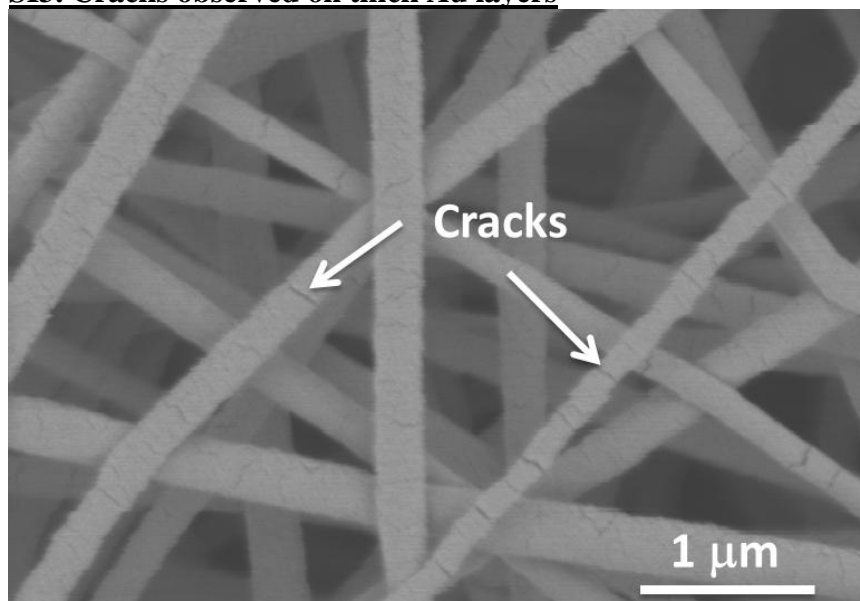

**Figure SI3.** SEM of PAN/Au NFs obtained by electrospinning for 240 s followed by sputtering of 284 nm of Au layer

### SI4. PAN NFs biocathode activity towards O<sub>2</sub> reduction with and without immobilized ABTS

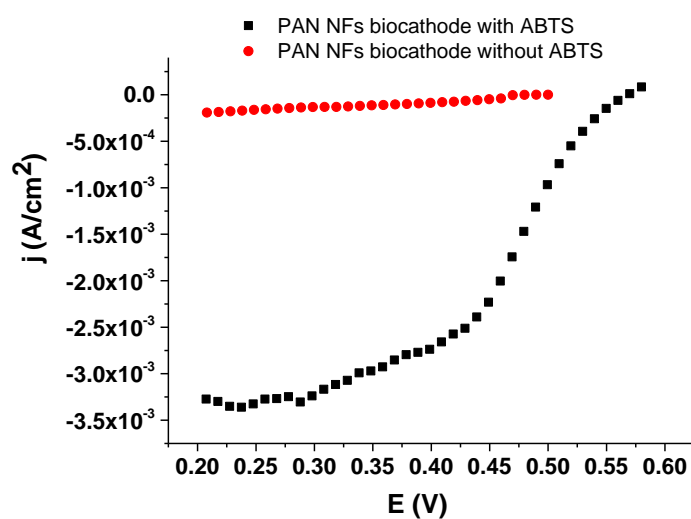

**Figure SI4.** Polarization curves of a PAN NFs biocathode with and without immobilized ABTS in O<sub>2</sub>-saturated phosphate solution (pH 5, 0.1M). Scan rate 3.3 mV s<sup>-1</sup>.

### SI5. Characterization of the bioanode

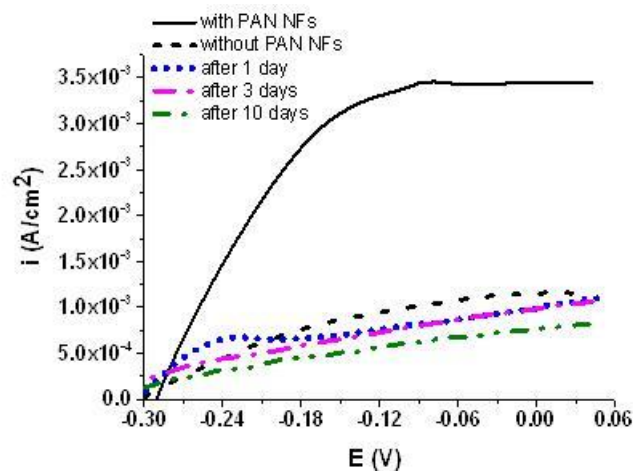

**Figure SI5.** Polarization curves of a bioanode with and without PAN NFs in phosphate solution (pH 9, 0.1M) with 160  $\mu\text{L}$  ethanol. Evolution of the polarization curves of the PAN NFs bioanode with time (after one, three, and ten days). Scan rate  $3.3 \text{ mV s}^{-1}$ .

### SI6. Characterization of the bioanode

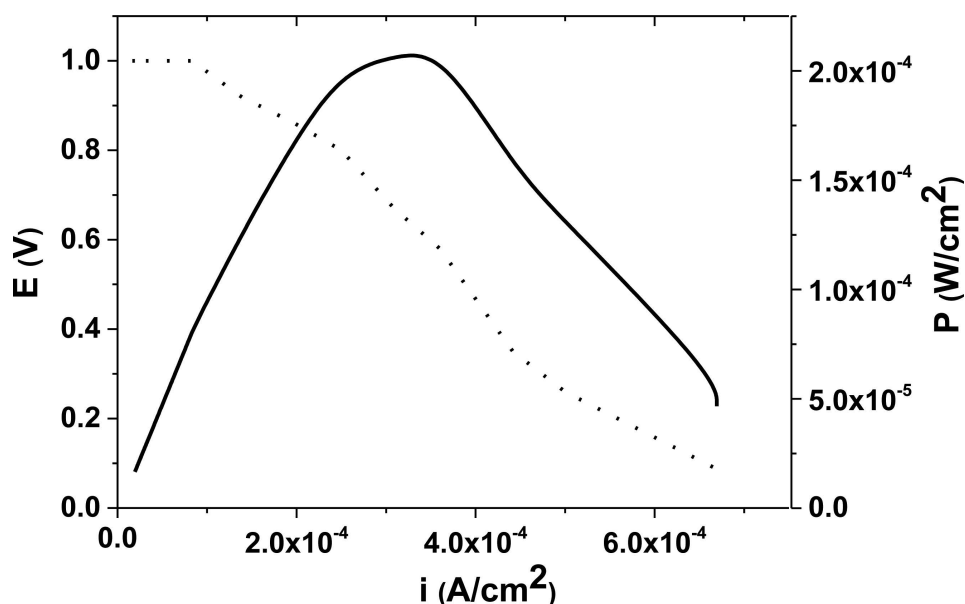

**Figure SI6.** Typical cell voltage (dashed line) and resulting power density (bold line) versus current density of the constructed laccase biocathodes with respect to ADH bioanodes, evaluated on the basis of the cell voltage upon changing the external resistance between  $1\text{k}\Omega$  and  $1\text{M}\Omega$ .
